1 **Bacteriological Monitoring and Evaluation of Cleaning-disinfection of**  
2 **Computer-related Equipment in an Obstetric and Gynecology Hospital**

3 Meiling Li<sup>1\*</sup>, Tingyan Lu<sup>2</sup>, Hongwei Zhang<sup>3</sup>, Shufang Chen<sup>1\*</sup>, Xueying Mao<sup>4</sup>, Li Shen<sup>2</sup>,  
4 Yan Lu<sup>5</sup> and Shufang Leng<sup>1</sup>

5 <sup>1</sup> Department of hospital infection management, The International Peace Maternity & Child  
6 Health Hospital of China welfare institute attached to Shanghai Jiao Tong university school  
7 of medicine, Shanghai, China

8 <sup>2</sup> Department of Clinical laboratory, The International Peace Maternity & Child Health  
9 Hospital of China welfare institute attached to Shanghai Jiao Tong university school of  
10 medicine, Shanghai, China

11 <sup>3</sup> Department of Epidemiology, Secondary Military Medical University, Shanghai, China.

12 <sup>4</sup> Centre for Molecular Oncology, Barts Cancer Institute, Barts and the London School of  
13 Medicine and Dentistry, Queen Mary University of London, London, UK

14 <sup>5</sup> Department of Internal medicine, The International Peace Maternity & Child Health  
15 Hospital of China welfare institute attached to Shanghai Jiao Tong university school of  
16 medicine, Shanghai, China

17 **Corresponding author:** Meiling Li<sup>1\*</sup>: E-mail address: [limeilinghua@163.com](mailto:limeilinghua@163.com); Shufang  
18 Chen<sup>1\*</sup>: E-mail address: [18017316228@163.com](mailto:18017316228@163.com)

19

20 **Abstract**

21 It is already known that computer keyboards and mouses in hospitals are contaminated with  
22 different kinds of bacteria. However, the mouse pad has been neglected with regard to both research  
23 and regular cleaning and disinfection in hospitals. In our study, we monitored and evaluated the  
24 bacteriology degrees of 74 computers' keyboards, mouses and mouse pads from six  
25 departments. The results showed that before cleaning-disinfection, the contamination rate of the  
26 mouse pad ranked second following the keyboards. *Enterococcus Faecium* was cultured from  
27 the mouse pads. The computer-related equipment in the wards and outpatient rooms were  
28 much more contaminated than that in the operating rooms. *Acinetobacter spp.* was only  
29 isolated from the doctor's computers. After cleaning-disinfection, 4 strains of MRSA were  
30 isolated from the keyboards and the mouses, one and 3 were cultured at day 3 and day 5

31 after cleaning-disinfection, respectively. One strain of *Pseudomonas Aeruginosa* was  
32 isolated from the mouses at day 3 after cleaning-disinfection. These demonstrated that the  
33 bacterial contamination of the mouse pads must be as emphasized as that of the keyboards and  
34 mouses. Furthermore, It is better to clean and disinfect the computer-related  
35 equipment(keyboards, mouses, mouse pads) at least once a day.

36 **Keywords:** Contamination; Computer-related equipment; Cleaning-disinfection;

37

## 38 **Introduction**

39 On a global scale, hospital-acquired infections (HAIs) have become one of the most  
40 important causes of morbidity and mortality in medical institutions[1-5] and also threaten  
41 the safety of health-care providers[6]. According to a survey from the World Health  
42 Organization, there are approximately 1.7 million and 4.5 million HAI patients in USA and  
43 Europe, respectively, accounting for 37,000 and 100,000 deaths each year. Many pathogens,  
44 such as MRSA, VRE, *Acinetobacter*, *Klebsiella*, *Listeria*, *Escherichia coli*, *Mycobacterium*  
45 *tuberculosis*, *Pseudomonas aeruginosa* and the Noel virus, can survive on a dry object  
46 surface for several months or even a year [7-9]. Therefore, cleaning and disinfecting the  
47 high-touch object surfaces is an important measure for controlling HAIs [10].

48 There have been many studies emphasizing the importance of cleaning and disinfecting  
49 the computer keyboard and mouse in healthcare settings, representing an important type of  
50 high-touch object surface. One study demonstrated that 95% of keyboards in a teaching  
51 hospital had growth of one or more microorganisms, and 5% were positive for pathogens  
52 known to be associated with HAI transmission, such as *Staphylococcus aureus* and  
53 *Enterococci* [11]. Some studies showed that the keyboard or mouse was one of the most  
54 likely bacterial vehicles in the ICU and that the degree of contamination cannot be  
55 neglected [12-14]. A survey of two acute district general hospitals indicated that MRSA  
56 had been identified on computer terminals (24%), and five of the MRSA-positive terminals  
57 were from hospital A, which had a significantly higher rate of MRSA transmission than  
58 hospital B [15]. However, the mouse pads have been neglected in both research and the  
59 regular cleaning-disinfection in hospitals.

60 In our research, we aimed to address four issues: 1) The bacteriological characteristics  
61 of computer-related equipment, especially the mouse pad; 2) The bacteriological

62 characteristics of computer-related equipment in different clinical departments; 3) The  
63 bacteriological characteristics of doctor's and nurse's computer-related equipment in the  
64 wards; 4) How often we should clean and disinfect computer-related equipment.

65

## 66 **Materials and methods**

### 67 **Study Object Selection**

68 chosen between October 2014 and December 2015 ([Supplementary Table 1](#)). In the  
69 wards, 1 nurse's station computer, 1 doctor's office computer and 1 doctor's mobile  
70 computer from each obstetric and gynecology ward were selected randomly for testing.  
71 Five samples were collected from every surface, including before cleaning-disinfection,  
72 immediately after cleaning-disinfection and day 1, day 3 and day 5 after  
73 cleaning-disinfection.

### 74 **Sample Method**

75 Samples were collected from the keyboard (including the Number keys, Character keys,  
76 Enter key, Shift key, and Space bar), the mouse (except the underside) and the mouse pad  
77 (area $\geq$ 100cm<sup>2</sup>). Sterile swabs dipped with sterile saline solution or neutralizing agent were  
78 smeared and rolled evenly back and forth five times on the surfaces. The hand-contacted  
79 part of the swabs was cut off, and the rest was put into a sampling tube containing 10 ml of  
80 sterile saline solution or neutralizing agent. All samples (947 samples) were sent to the  
81 clinical laboratory immediately.

### 82 **Bacteriology Identification**

83 In a biological safety cabinet, the sampling tubes were shaken for 30s on an oscillator,  
84 100 $\mu$ l of each sample was transferred to blood-agar culture medium plates, and the plates  
85 were cultured for 48 hours at 35°C in an incubator. Colonies were counted and identified  
86 by Gram stain, catalase test, oxidase test, plasma coagulase test, biochemical tube test or  
87 using a VITEK-2 instrument for bacterial identification. Drug-sensitive testing was only  
88 used for detecting MRSA.

### 89 **Statistical analysis**

90 SPSS 17.0 software was used for statistical analysis and used the following parameters:  
91  $\alpha = 0.05$ , which may be calibrated according to the specific statistical data:

92  $\alpha' = 2\alpha \div [R \times (R - 1)]$ , in which R was the number of sample rates that had to be compared  
93 in pairs. The contamination rate (%) was the proportion of samples with bacterial colonies  
94  $>10$  cfu/cm<sup>2</sup>.

95

## 96 **Results**

### 97 **Bacteriological Analysis before Cleaning-disinfection**

#### 98 **The bacterial contamination of keyboards, mice and mouse pads**

99 As shown in [Table 1](#), there were significant differences in the contamination rate  
100 between the keyboard group and the mouse group, as well as between the mouse group and  
101 mouse pad group, from high to low was keyboards, mouse pads and mice, respectively. The  
102 potentially pathogenic bacteria cultured from the computer-related equipment was as  
103 shown in [Supplementary Table 2](#), One isolate of *Enterococcus Faecium* was cultured from  
104 the mouse pad. *Klebsiella. Pneumoniae*, *Pseudomonas*, and *Enterobacter cloacae* were  
105 isolated from the keyboard. *Acinetobacter lwoffii* were mainly cultured from the mouse pad  
106 and keyboard.

107 **Table 1** The contamination rates of keyboard, mouse and mouse pad.

|           | N  | Contamination Rate (%) | Median | IQR      | P-value <sup>1</sup>      |
|-----------|----|------------------------|--------|----------|---------------------------|
| Keyboard  | 74 | 39.1                   | 9.0    | 1.8-18.3 | <b>0.000</b> <sup>2</sup> |
| Mouse     | 74 | 12.2                   | 2.5    | 1.0-6.0  | <b>0.004</b> <sup>3</sup> |
| Mouse pad | 47 | 34.0                   | 5.0    | 2.0-16.0 | 0.568 <sup>4</sup>        |

108 <sup>1</sup> P-value was calculated for the contamination rate,  $\alpha' = 0.017$

109 <sup>2</sup> P-value was calculated between the Keyboard group and Mouse group

110 <sup>3</sup> P-value was calculated between the Mouse group and Mouse pad group

111 <sup>4</sup> P-value was calculated between the Keyboard group and Mouse pad group

112

113

#### 114 **The bacterial contamination of the computer-related equipment in different** 115 **departments**

116 As shown in [Table 2](#), the computer-related equipment in the wards and outpatient  
117 rooms were much more contaminated than that in the other departments. In total, 8 isolates  
118 of *Staphylococcus aureus* were cultured, 5, 1, 1, and 1 from the wards, outpatient rooms,  
119 neonatal dept., and delivery room, respectively. *Enterobacter cloacae*, and *Pseudomonas*

120 were cultured from the wards. *Enterococcus Faecium* was from the neonatal dept.  
 121 *Klebsiella. Pneumoniae* was isolated from the operating rooms ([Supplementary Table 3](#)).

122 **Table 2** The contamination rate of computer-related equipment in different departments before  
 123 cleaning-disinfection

|                             | N  | <sup>1</sup> Contamination Rate (%) | Median | IQR      | P-value      |
|-----------------------------|----|-------------------------------------|--------|----------|--------------|
| Wards                       | 72 | 38.9                                | 8.5    | 3.0-17.5 | <b>0.000</b> |
| Outpatient Room             | 42 | 33.3                                | 5.5    | 2.0-14.5 | <b>0.001</b> |
| Delivery Room               | 14 | 28.6                                | 4.0    | 1.0-15.3 | 0.036        |
| Medical Dept.               | 10 | 30.0                                | 3.0    | 2.0-15.0 | 0.051        |
| Neonatal Dept.              | 20 | 15.0                                | 0.0    | 0.0-5.8  | 0.325        |
| Operating Room <sup>2</sup> | 39 | 5.1                                 | 1.0    | 0.0-4.0  |              |

124 <sup>1</sup> Contamination rate is the subject of P-value calculation,  $\alpha' = 0.005$

125 <sup>2</sup> Operating Room as the control group

126

127

128 **The bacterial contamination of the doctor's and nurse's computer-related equipment**  
 129 **in the obstetric and gynecology wards**

130 There was no significant difference in the contamination rate between the doctor's  
 131 office/mobile computer-related equipment and the nurse's computer-related equipment in  
 132 the obstetric and gynecology wards ([Table 3](#)). The species of potentially pathogenic  
 133 bacteria from the doctor's computers was more than that from the nurse's computers,  
 134 *Acinetobacter lwoffii* and *Acinetobacter ursingii* were isolated from the doctor's computers.  
 135 One strain of *Enterobacter cloacae* was from the nurse's computers in the gynecology  
 136 wards, 2 isolated of *Pseudomonas* were cultured from the obstetric wards ([Supplementary](#)  
 137 [Table 4-5](#)).

138 **Table 3** The contamination rate of computer-related equipment in obstetric and gynecology wards before  
 139 cleaning-disinfection

|                                        | N  | Contamination Rate (%) | Median | IQR      | P-value <sup>1</sup> |
|----------------------------------------|----|------------------------|--------|----------|----------------------|
| Obstetric wards                        | 40 | 42.5                   | 9.0    | 5.0-17.5 |                      |
| Doctor's office computers              | 14 | 50.0                   | 11.5   | 4.5-19.3 | 0.310                |
| Doctor's mobile computers              | 13 | 46.2                   | 10.0   | 5.5-50.0 | 0.420                |
| Nurse's station computers <sup>2</sup> | 13 | 30.8                   | 7.0    | 2.0-12.5 |                      |
| Gynecology wards                       | 27 | 40.7                   | 6.0    | 2.0-22.0 |                      |

|                                        |    |      |      |          |              |
|----------------------------------------|----|------|------|----------|--------------|
| Doctor's office computers              | 10 | 70.0 | 20.5 | 5.5-32.3 | <b>0.070</b> |
| Doctor's mobile computers              | 8  | 25.0 | 2.5  | 2.0-11.8 | 1.000        |
| Nurse's station computers <sup>2</sup> | 9  | 22.2 | 5.0  | 2.0-12.0 |              |

140 <sup>1</sup> calculated for the contamination rate,  $\alpha = 0.05$

141 <sup>2</sup> control group

142

143

#### 144 **Bacteriological Analysis after Cleaning-disinfection**

145 As shown in [Table 4](#), at day 1 and day 3 after cleaning-disinfection, the  
 146 contamination rates of the computer-related equipment gradually increased, and the  
 147 contamination rate of mouse pads ranked the second following the keyboards. 4 strains of  
 148 MRSA were isolated from the keyboards and the mouses, one and 3 were cultured at day 3  
 149 and day 5 after cleaning-disinfection, respectively. Furthermore, the strain of  
 150 *Staphylococcus aureus* gradually increased (7, 8 and 10 strains). 11, 7, and 7 were isolated  
 151 from the keyboards, and mouses and mouse pads, respectively. One strain of *Pseudomonas*  
 152 *Aeruginosa* was isolated from the mouses at day 3 after cleaning-disinfection  
 153 ([Supplementary Table 6](#)).

154 **Table 4** The contamination rate of computer-related equipment after cleaning-disinfection.

|           | N  | Cleaning-<br>disinfection<br>Rate | Contamination<br>Rate (%)<br><sup>1</sup> BCD | Contamination<br>Rate (%)<br><sup>2</sup> ACD Day 1 | Contamination<br>Rate (%)<br><sup>2</sup> ACD Day 3 | Contamination Rate<br>(%)<br><sup>2</sup> ACD Day 5 |
|-----------|----|-----------------------------------|-----------------------------------------------|-----------------------------------------------------|-----------------------------------------------------|-----------------------------------------------------|
| Keyboard  | 74 | 98.5                              | 39.1                                          | 46.6                                                | 54.8                                                | 54.7                                                |
| Mouse     | 74 | 97.9                              | 12.2                                          | 17.8                                                | 20.6                                                | 18.8                                                |
| Mouse pad | 47 | 99.3                              | 34.0                                          | 36.2                                                | 37.2                                                | 27.9                                                |

155 <sup>1</sup> BCD: Before Cleaning-disinfection

156 <sup>2</sup> ACD: After Cleaning-disinfection

157

158

#### 159 **Discussion**

160 Cleaning and disinfecting object in the hospital is significantly important for  
 161 controlling hospital associated infections [16-19]. In this study, we found that the  
 162 contamination rate of mouse pads ranked second following the keyboards (34.0% vs  
 163 39.1%). The mouse pad is one of the high-touch objects so that it can be a “**container**” for  
 164 pathogens. In another study was the contamination rate of the mouse pad researched, and

165 the results were as same as in our study [20]. The mouse pads have been relatively  
166 disregarded in the medical settings. Furthermore, the contamination rates of  
167 computer-related equipment in the wards and outpatient rooms were significantly higher  
168 than that in the operating rooms. In the gynecology wards, the contamination rate of the  
169 doctor's computer-related equipment was higher than that of nurse's computer-related  
170 equipment.

171 The most common bacteria cultured from the computer-related equipment was  
172 *Coagulase-negative staphylococcus*, This finding was similar to the results of William's  
173 study[21]. In total, 60 isolates of *Acinetobacter* were detected including 41 isolates of  
174 *Acinetobacter lwoffii*, 16 isolates of *Acinetobacter ursingii*, and 3 isolates of *Acinetobacter*  
175 *baumannii*. As an opportunistic pathogen, *A.baumannii* is one of the most clinically  
176 significant multidrug-resistant bacteria, which can cause of the nosocomial infections,  
177 especially in intensive care units [22-24]. It can persist and form biofilms on various abiotic  
178 materials in the hospital environment [24]. Contamination of ambient air with  
179 *Acinetobacter baumannii* was also a transmission way in Luis A study [25]. Despite  
180 *Acinetobacter spp.* (*A. lwoffii*, *A. ursingii* ) other than *A. baumannii* were often considered  
181 relatively avirulent bacteria, they were able to be the opportunists in the presence of  
182 indwelling medical devices and caused invasive diseases [26]. A former research found that  
183 indwelling catheter-related with *A. lwoffii* bacteremia in immunocompromised hosts  
184 appeared to be associated with a low risk of mortality [27]. A bacteremia caused by *A.*  
185 *ursingii* in a patient with a pulmonary adenocarcinoma confirmed that it was an  
186 opportunistic human pathogen for the first time [28]. 33 strains of *Staphylococcus aureus*  
187 were detected, including 4 strains of MRSA. MRSA was previously detected from  
188 healthcare personnel computers [15, 29]. The other importantly isolated bacteria included  
189 *Enterococcus Faecalis*, *Enterococcus Faecium*, *Klebsiella. Pneumoniae*, *Enterobacter*  
190 *cloacae*, and *Pseudomonas Aeruginosa*.

191 The above isolated potentially pathogenic bacteria were also cultured from the samples  
192 of the HAI patients in our hospital, their detection rates were as shown in **Table 5**. the most  
193 common pathogens from HAI patients were *Enterococcus Faecalis*. this may be associated  
194 with the characteristic of maternity hospitals,with the large number of samples taken from  
195 the genital tract. *Staphylococcus aureus* and *Coagulase-negative staphylococcus* were also

196 the main pathogens from HAI patients. The majority of *Staphylococcus aureus* were  
197 cultured from surgical incisions, and 12 cases were MRSA positive. In the process of  
198 “patient-object-patient” pathogens transmission, hand carriage plays an important role.

**Table 5** The strain and percentage of the associated pathogenic bacteria from HAI patients in 2014-2016

|                                   | Strain (%) |
|-----------------------------------|------------|
| Enterococcus Faecalis             | 113 (14.9) |
| Staphylococcus aureus             | 38 (5.0)   |
| MRSA                              | 12 (1.6)   |
| Coagulase-negative staphylococcus | 31 (4.1)   |
| Klebsiella. pneumoniae            | 26 (3.4)   |
| Enterococcus Faecium              | 25 (3.3)   |
| Enterobacter cloacae              | 9 (1.2)    |
| Pseudomonas Aeruginosa            | 9 (1.2)    |
| Acinetobacter baumannii           | 3 (0.4)    |
| Acinetobacter Iwoffii             | 1 (0.1)    |
| Micrococcus                       | 1 (0.1)    |

199

200

201 A limitation of the study was the absence of bacteria homology detection among  
202 different computer equipment or between the computer equipment and HAI patients who  
203 were infected with the same bacteria. It will be further explored in the future study.

204

## 205 **Conclusions**

206 In summary, we found that the cleaning and disinfection of mouse pads must be  
207 brought to attention in the hospitals. Furthermore, it was better to clean and disinfect the  
208 computer-related equipment at least 1 time/day. At the same time, health-care workers  
209 should stick to good hand hygiene.

210

## 211 **Acknowledgements**

212 Not applicable

213

## 214 **References**

215 1. Schumacher M, Allignol A, Beyersmann J, Binder N, Wolkewitz M. 2013. Hospital-acquired  
216 infections appropriate statistical treatment is urgently needed! *Int J Epidemiol* **42**:1502-1508.



- 217 2. **Allegranzi B, Bagheri Nejad S, Combescure C, et al.** 2011, Burden of endemic  
218 health-care-associated infection in developing countries: systematic review and meta-analysis. *Lancet*  
219 **377**:228–241.
- 220 3. **Klevens RM, Edwards JR, Richards CL, et al.** 2007. Estimating health care-associated infections  
221 and deaths in U.S. hospitals, 2002. *Public Health Rep* **122**:160–166.
- 222 4. **ECDC.** Annual epidemiological report on communicable diseases in Europe, 2008: Report on the  
223 State of Communicable Diseases in the EU and EEA/EFTA Countries. 2008.
- 224 5. **Yatin Mehta, Abhinav Gupta, Subhash Todi, et al.** 2014. Guidelines for prevention of hospital  
225 acquired Infections. *Indian J Crit Care Med* **18**: 149-163.
- 226 6. **Flanagan ME, Welsh CA, Kiess C, et al.** 2011. A national collaborative for reducing health care  
227 associated infections: current initiatives, challenges, and opportunities. *Am J Infect Control* **39**:685-689.
- 228 7. **Dancer SJ.** 2009. Mopping up hospital infection. *J Hosp Infect* **43**: 85-100.
- 229 8. **Dancer SJ.** 2008. Importance of the environment in meticillin resistant *Staphylococcus aureus*  
230 acquisition: the case for hospital cleaning. *Lancet Infect Dis* **8**:101-113.
- 231 9. **Kramer A, Schwebke I, Kampf G.** 2006. How long do nosocomial pathogens persist on inanimate  
232 surfaces? *BMC Infect Dis* **16**:130.
- 233 10. **Murni IK, Duke T, Kinney S, et al.** 2015. Reducing hospital-acquired infections and improving  
234 the rational use of antibiotics in a developing country: an effectiveness study. *Arch Dis Child* **100**:  
235 454-459.
- 236 11. **Schultz M, Gill J, Zubairi S, Huber R, Gordin F.** 2003. Bacterial Contamination of Computer  
237 Keyboards in a Teaching Hospital. *Infect Control Hosp Epidemiol* **24**:302-303.
- 238 12. **Ghamdi AA, Shukri H, Yamani A, Hawsawi H, Bagatadah K, Gharawi L, Shukri N, AlEnazi**  
239 **W.** 2011. Computer keyboards and mice contamination at intensive care unit in Western Region in  
240 Kingdom of Saudi Arabia. *J Crit Care* **26**:38–39.
- 241 13. **Hartmann B, Benson M, Junger A, Quinzio L, Röhrig R, Fengler B, Färber UW, Wille**  
242 **B, Hempelmann G.** 2004. Computer Keyboard and Mouse as a Reservoir of Pathogens in an Intensive  
243 Care Unit. *J Clin Monit Comput* **18**:7-12.
- 244 14. **Moore G, Muzslay M, Wilson AP.** 2013. The Type, Level, and Distribution of Microorganisms  
245 within the Ward Environment: A Zonal Analysis of an Intensive Care Unit and a Gastrointestinal  
246 Surgical Ward. *Infect Control Hosp Epidemiol* **34**:500-506.

- 247 15. **Cooke RP, Wright EP.** 2001. Is methicillin-resistant *Staphylococcus aureus* (MRSA) contamination o  
248 f ward-based computer terminals as surrogate marker for nosocomial MRSA transmission and handwashi  
249 ng compliance? *J Hosp Infect* **48**:72-75.
- 250 16. **Dancer SJ.** 2009. The role of environmental cleaning in the control of hospital-acquired infection. *J*  
251 *Hosp Infect* **73**:378-385.
- 252 17. **Pereira da Fonseca TA, Pessoa R, Felix AC, Sanabani SS.** 2016.  
253 Diversity of Bacterial Communities on Four Frequently Used Surfaces in a Large Brazilian Teaching  
254 Hospital. *Int J Environ Res Public Health* **13**:152.
- 255 18. **Donskey CJ.** 2013. Does improving surface cleaning and sterilization reduce health care-associated  
256 infections? *Am J Infect Control* **41**:12-19.
- 257 19. **Otter JA, Yezli S, Salkeld JA, French GL.** 2013. Evidence that contaminated surfaces contribute  
258 to the transmission of hospital pathogens and an overview of strategies to address contaminated surfaces  
259 in hospital settings. *Am J Infect Control* **41**:6-11.
- 260 20. **Man GS, Olajoku M, Chadwick MV, Vuddamalay P, Hall AV, Edwards A, Kerr JR.** 2002.  
261 Bacterial contamination of ward-based computer terminals. *J Hosp Infect* **52**:314-315.
- 262 21. **Rutala WA, White MS, Gergen MF, Weber DJ .** 2006. Bacterial Contamination of Keyboards:  
263 Efficacy and Functional Impact of Disinfectants. *Infect Control Hosp Epidemiol* **27**:372-377.
- 264 22. **Munoz-Price LS, Weinstein RA.** 2008. Acinetobacter infection. *N Engl J Med* **358**:1271-1281.
- 265 23. **Atlanta, GA.** 2013. Antibiotic resistance threats in the United States. Centers for Disease Control  
266 and Prevention 2013.
- 267 24. **Paweł K, Agnieszka C, Monika P, Dorota R, Jadwiga WM.** 2017. *Acinetobacter baumannii* isolated  
268 from hospital-acquired infection: biofilm production and drug susceptibility. *APMIS* **125**: 1017 – 1026.
- 269 25. **Luis A. Shimose, Yohei Doi, Robert A. Bonomo, Dennise De Pascale, Roberto A. Viau,**  
270 **Timothy Cleary, Nicholas Namias, Daniel H. Kett, L. Silvia Munoz-Price.** 2015. Contamination of  
271 Ambient Air with *Acinetobacter baumannii* on Consecutive Inpatient Days. *J Clin Microbiol* **53**:  
272 2346-2348.
- 273 26. **H. Seifert, A. Strate, A. Schulze, G. Pulverer.** 1994. Bacteremia due to *Acinetobacter* Species  
274 Other than *Acinetobacter baumannii*. *Infection* **22**:379-385.
- 275 27. **Ku SC, Hsueh PR., Yang PC, Luh KT.** 2000. Clinical and Microbiological Characteristics of  
276 Bacteremia Caused by *Acinetobacter lwoffii*. *Eur J Clin Microbiol Infect Dis* **19**:501–505.

277 28. Julien L, Liliana MA, Anne F, Etienne P, Gerard H, Patrick AD, Grimont AB. 2003.  
278 Bacteremia Caused by *Acinetobacter ursingii*. *J Clin Microbiol* **41**: 1337–1338.

279 29. Oguzkaya-Artan M, Baykan Z, Artan C, Avsarogullari L. 2015. Prevalence and risk factors for  
280 methicillin resistant *Staphylococcus aureus* carriage among emergency department workers and bacterial  
281 contamination on touch surfaces in Erciyes University Hospital, Kayseri, Turkey. *Afr Health Sci* **15**:  
282 1289-1294.

283

#### 284 **Authors' contributions**

285 Meiling Li designed the study, finished all experimental tests, collected and analyzed  
286 the data and wrote the manuscript. Shufang Chen made a contribution to design the study,  
287 analyze data and wrote the manuscript. Tingyan Lu guided the bacteria test and data  
288 analysis. Hongwei Zhang contributed to guide the data analysis and modify the manuscript.  
289 Xueying Mao done a great job to revise and polish the manuscript in English. Li Shen took  
290 part in doing the experimental test. Yan Lu took part in the design of this study. Shufang  
291 Leng took part in collect the data. All authors read and approved the final manuscript.

292

#### 293 **Additional information**

294 **Competing interests:** The authors declared no conflict of interest in the manuscript.

295 **Funding:** This research was funded by the hospital funding(GFY5508)
